# Supplementary material
Source: Springer Nature journal article supplement (https://www.springermedizin.de/resource/supplementary/12881_2012_980_MOESM3_ESM.pdf/9451734)
Supplement: MOESM3 [file 9451734]

**A**

Allegro v1.2c (MultiPointPar) - Computation in sets of 100 markers

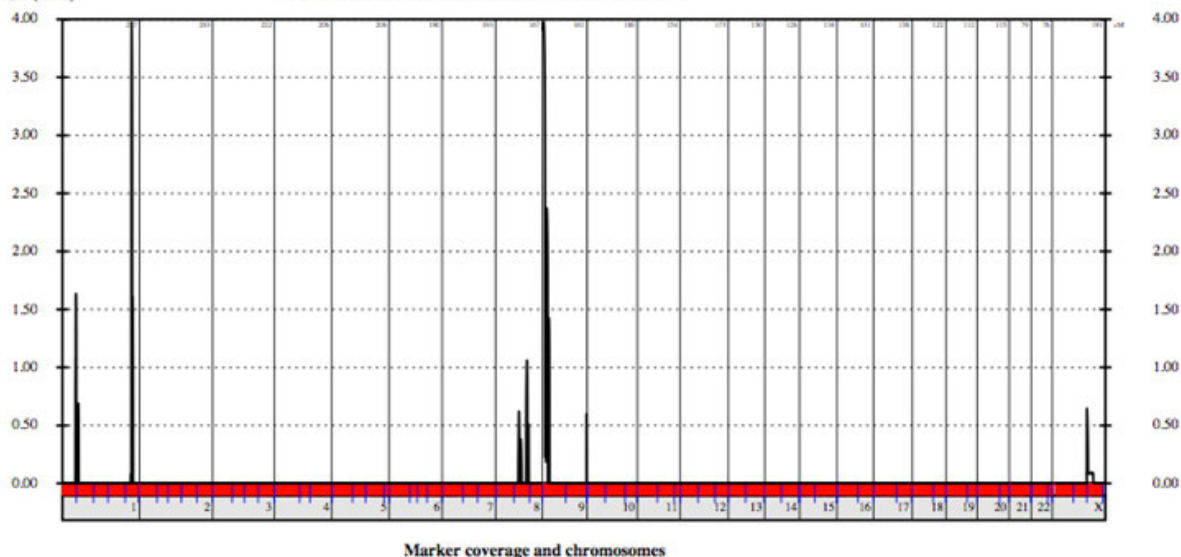**B**

Control

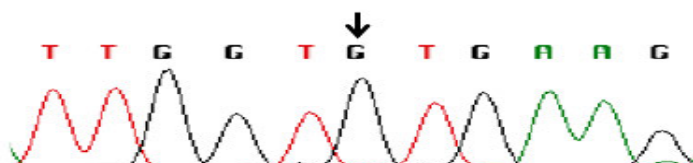Affected  
Family 1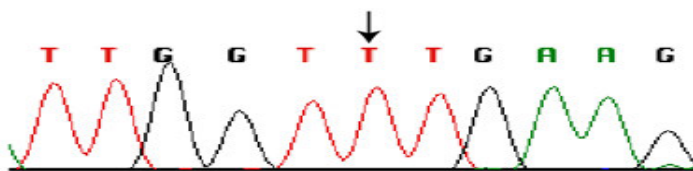Affected  
Family 2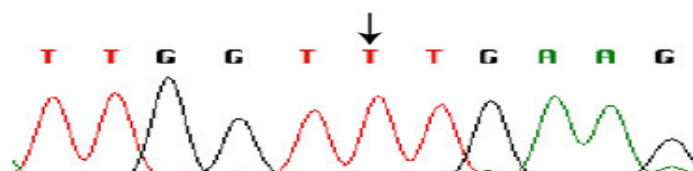**C**

↓

| Gaps         | W | C | E |
|--------------|---|---|---|
| Human        | W | C | E |
| Chimp        | W | C | E |
| Gorilla      | W | C | E |
| Orangutan    | W | C | E |
| Rhesus       | W | C | E |
| Baboon       | W | C | E |
| Marmoset     | W | C | E |
| Tarsier      | W | C | E |
| Mouse        | W | C | E |
| Cow          | W | C | E |
| Dog          | W | C | E |
| Elephant     | W | C | E |
| Opossum      | W | C | E |
| Lizard       | W | C | E |
| X_tropicalis | W | C | N |
| Tetraodon    | W | C | A |
| Fugu         | W | C | A |
| Stickleback  | W | C | A |
| Zebrafish    | W | C | N |
